# Supplementary material for: Self-assembled mesoporous TiO2 spherical nanoparticles by a new templating pathway and its enhanced photoconductivity in the presence of an organic dye
Source: Royal Society of Chemistry journal article supplement (doi:10.1039/c0jm02937h), 2011-01-01

Self-assembled mesoporous TiO<sub>2</sub> spherical nanoparticles by a new templating pathway and its enhanced photoconductivity in the presence of an organic dye

Astam K. Patra, Swapan K. Das and Asim Bhaumik\*

**Supporting Information**

**Figure captions**

**Figure S1.** Wide angle XRD patterns of as-synthesized MT-2A (a) and MT-2B (b).

**Figure S2.** **A:** N<sub>2</sub> adsorption (●)-desorption (○) isotherms of the MT-1B and pore size distribution using NLDFT method are shown in the inset. **B:** N<sub>2</sub> adsorption (●)-desorption (○) isotherms of the MT-2A and pore size distribution using NLDFT method are shown in the inset.

Figure S1 [Patra, Das and Bhaumik

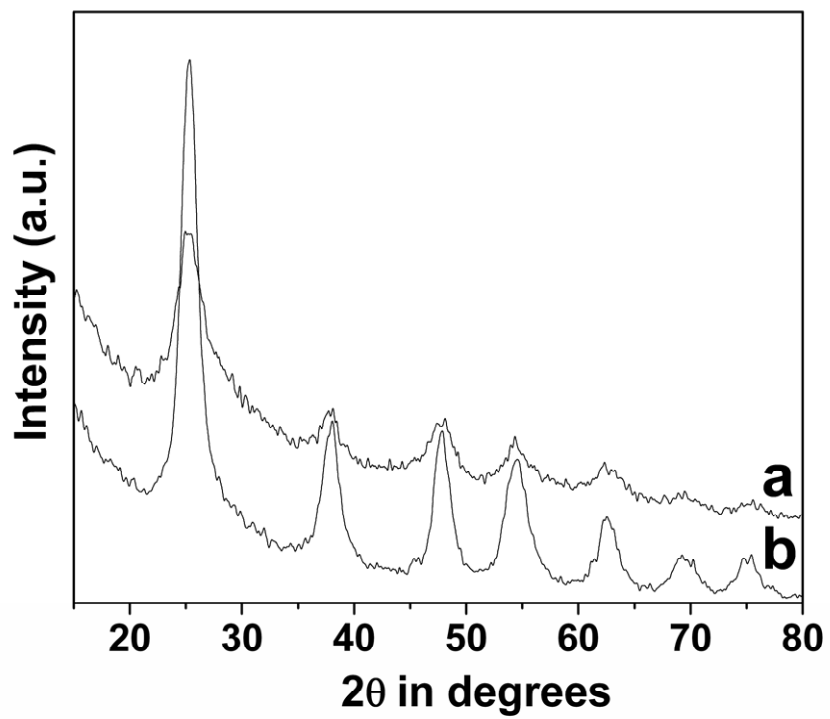

Figure S2 [Patra, Das and Bhaumik]

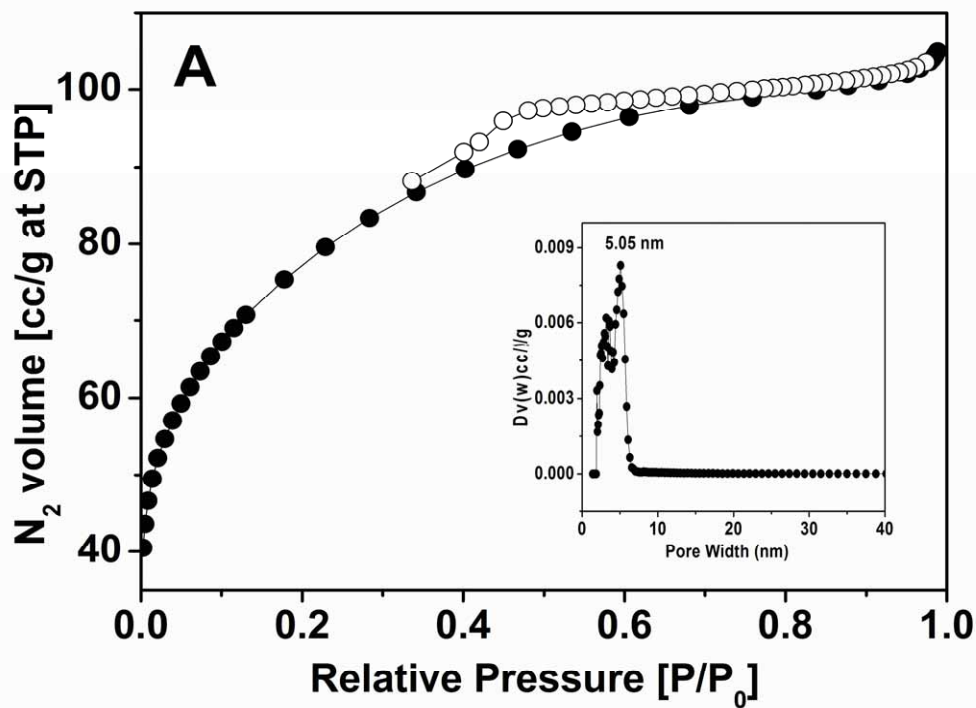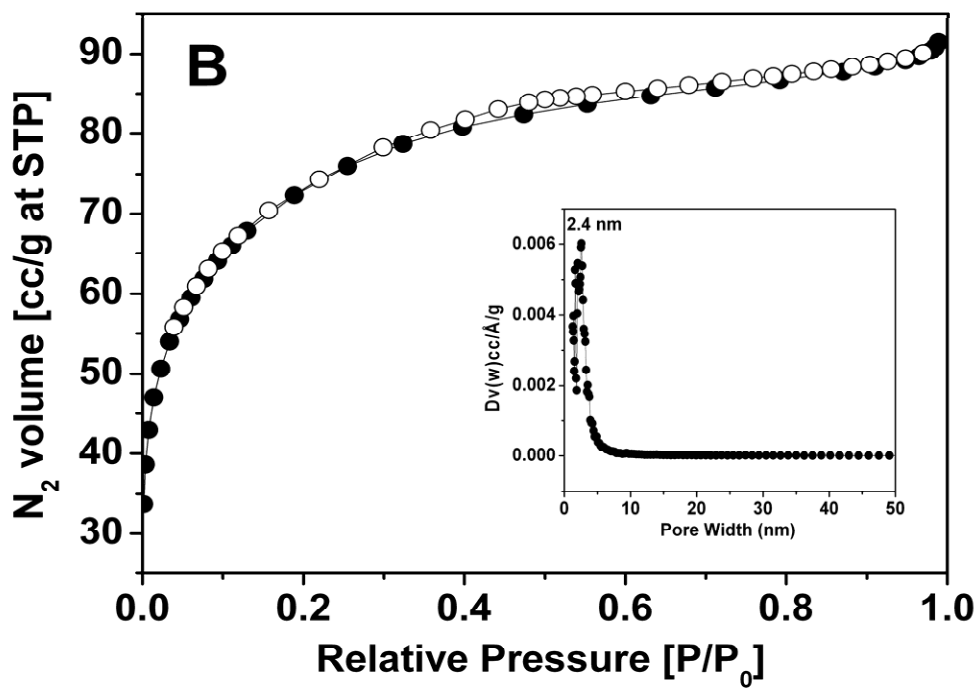

Supplement: c0jm02937h.pdf [file c0jm02937h.pdf]
